# Supplementary material for: Fluvial response to changes in the magnitude and frequency of sediment supply in a 1-D model
Source: Copernicus journal article supplement (doi:10.5194/esurf-6-1041-2018), 2018-11-14
Supplement: Supplementary file 1 [file esurf-6-1041-2018-supplement.zip]

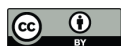

## *Supplement of*

# **Fluvial response to changes in the magnitude and frequency of sediment supply in a 1-D model**

**Tobias Müller and Marwan A. Hassan**

*Correspondence to:* Tobias Müller ([tobias.mueller@geog.ubc.ca](mailto:tobias.mueller@geog.ubc.ca))

- [esurf-6-1041-2018-supplement-title-page.pdf](#)
- [BESMo\\_SupplementVid\\_Equi20h.mp4](#)
- [BESMo\\_SupplementVid\\_Equi40h.mp4](#)
- [BESMo\\_SupplementVid\\_OF.mp4](#)
- [Supplement\\_Sensitivity2\\_listofsymbols.pdf](#)

The copyright of individual parts of the supplement might differ from the CC BY 4.0 License.
