# Supplementary material for: Fluvial response to changes in the magnitude and frequency of sediment supply in a 1-D model
Source: Copernicus journal article supplement (doi:10.5194/esurf-6-1041-2018), 2018-11-14
Supplement: Supplementary file 2 [file esurf-6-1041-2018-supplement.zip]

## List of symbols

|               |                                                                                        |
|---------------|----------------------------------------------------------------------------------------|
| $AR_{elp}$    | Armouring ratio at end of last pulse                                                   |
| $AR_{const}$  | Armouring ratio at end of constant feed run                                            |
| $D_{sg}$      | Surface geometric mean grain size [ $m$ ]                                              |
| $D_{subg}$    | Subsurface geometric mean grain size [ $m$ ]                                           |
| $D_{s50}$     | Surface 50th percentile grain size [ $m$ ]                                             |
| $D_{s84}$     | Surface 84th percentile grain size [ $m$ ]                                             |
| $D_{s90}$     | Surface 90th percentile grain size [ $m$ ]                                             |
| $D_{fg}$      | Feed geometric mean grain size [ $m$ ]                                                 |
| $D_{f90}$     | Feed 90th percentile grain size [ $m$ ]                                                |
| $D_{ag}$      | Armoured geometric mean grain size [ $m$ ]                                             |
| $D_{a90}$     | Armoured 90th percentile grain size [ $m$ ]                                            |
| $f_{Ii}$      | Proportion of $i$ th grain size class exchanged between the surface and the subsurface |
| $F_i$         | Surface frequency of $i$ th grain size class                                           |
| $Fr$          | Froude number                                                                          |
| $F_{pulse}$   | Pulse frequency [ $1/s$ ]                                                              |
| $g$           | Gravity [ $m/s^2$ ]                                                                    |
| $GSD_{fluv}$  | Channel surface grain size distribution                                                |
| $GSD_{pulse}$ | Pulsed sediment feed grain size distribution                                           |
| $h$           | Water depth [ $m$ ]                                                                    |
| $k_s$         | Roughness height [ $m$ ]                                                               |
| $l_r$         | Channel length [ $m$ ]                                                                 |
| $L_a$         | Active layer thickness [ $m$ ]                                                         |
| $M_{pulse}$   | Pulse magnitude [ $m^3$ ]                                                              |
| $n_k$         | Roughness height coefficient                                                           |
| $n_a$         | Scale of bed height fluctuation                                                        |
| $p_{bi}$      | Bedload transport rate fraction of $i$ th grain size class                             |
| $q_b$         | Bedload transport rate [ $m^2/s$ ]                                                     |
| $q_{bi}$      | Fractional bedload transport rate [ $m^2/s$ ]                                          |
| $Q_w$         | Water discharge [ $m^3/s$ ]                                                            |
| $S_f$         | Friction slope [ $m/m$ ]                                                               |
| $S_0$         | Bed slope [ $m/m$ ]                                                                    |
| $S_{mlp}$     | Mean channel slope at end of last pulse [ $m/m$ ]                                      |
| $S_{const}$   | Slope at the end of constant feed run [ $m/m$ ]                                        |
| $t$           | Time [ $s$ ]                                                                           |
| $T_{pp}$      | Pulse period [ $s$ ]                                                                   |
| $T_{fe}$      | Fluvial evacuation time [ $s$ ]                                                        |
| $T_{ar}$      | Fluvial armouring time [ $s$ ]                                                         |
| $T_{sim}$     | Duration of simulation [ $s$ ]                                                         |
| $u^*$         | Dimensionless shear velocity                                                           |
| $U_{fluv}$    | Fluvial export velocity [ $m/s$ ]                                                      |
| $U_{pulse}$   | Virtual pulse velocity [ $m/s$ ]                                                       |
| $w_r$         | Channel width [ $m$ ]                                                                  |
| $x$           | Downstream distance [ $m$ ]                                                            |
| $\alpha_r$    | Manning-Strickler coefficient                                                          |
| $\alpha$      | Active layer exchange ratio                                                            |
| $\eta_b$      | Bed surface elevation [ $m$ ]                                                          |
| $\lambda$     | Bed porosity                                                                           |
| $\rho$        | Water density [ $kg/m^3$ ]                                                             |
| $\sigma$      | Wideness of generated grain size distribution                                          |
| $\tau_b$      | Boundary shear stress [ $Pa$ ]                                                         |
| $\tau_{rm}$   | Reference shear stress [ $Pa$ ]                                                        |

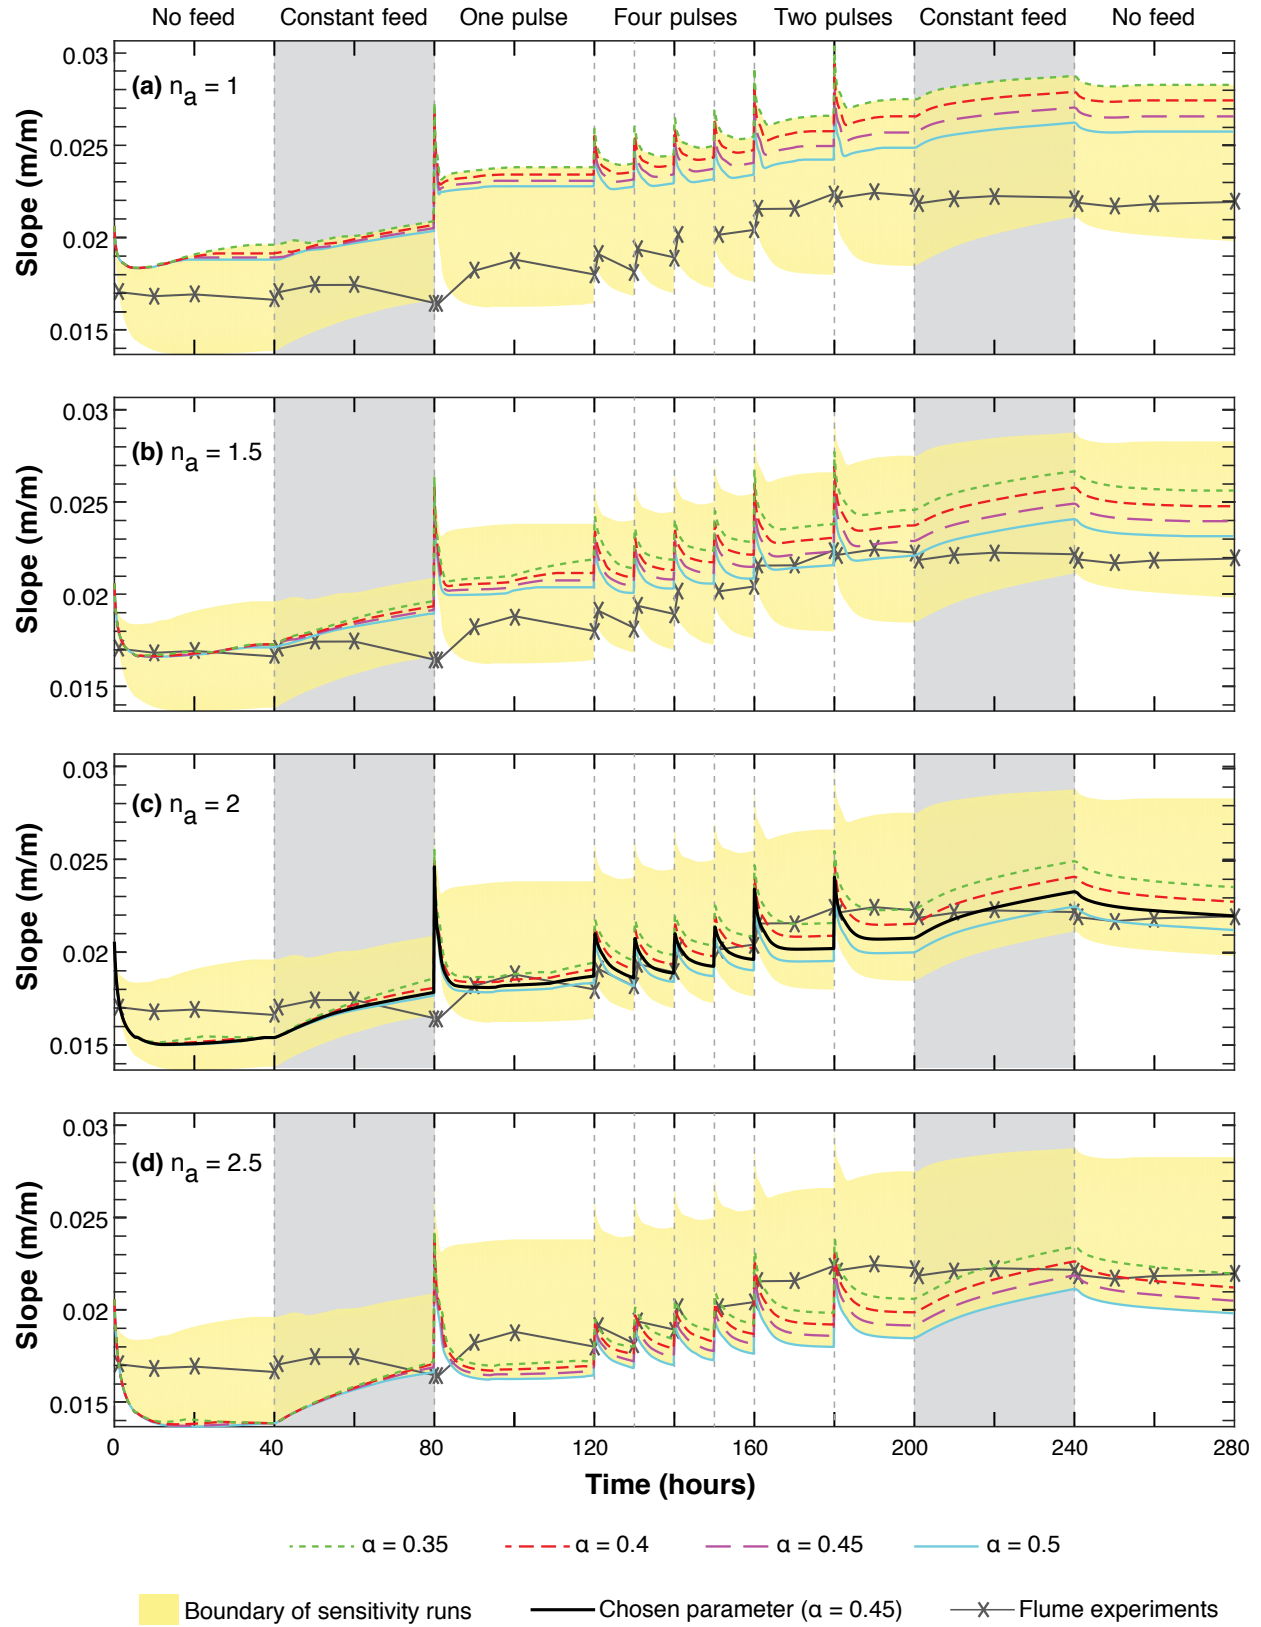

Figure S1: Sensitivity of modelled slope to active layer thickness factor  $n_a$  and active layer exchange ratio  $\alpha$  in the 'Original flume' (OF) event sequence.

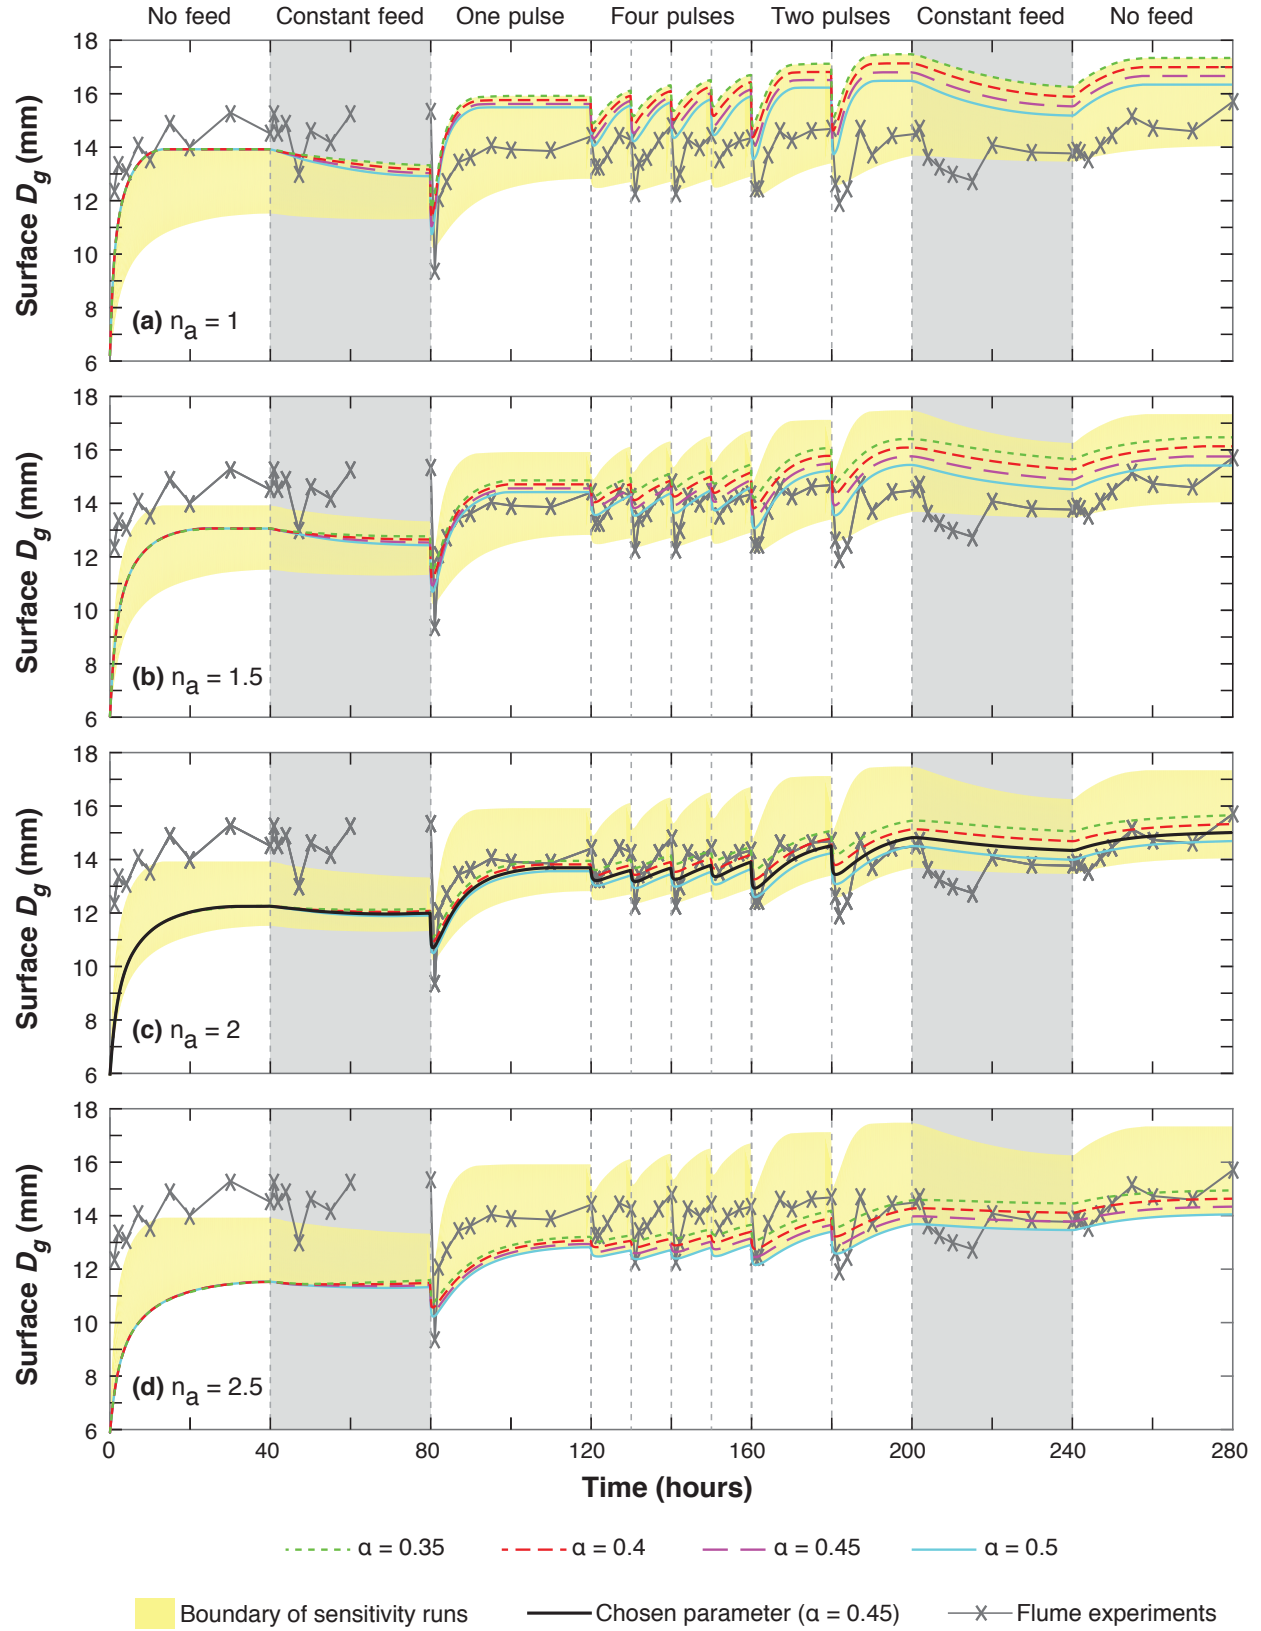

Figure S2: Sensitivity of modelled Surface  $D_g$  to active layer thickness factor  $n_a$  and active layer exchange ratio  $\alpha$  in the 'Original flume' (OF) event sequence.

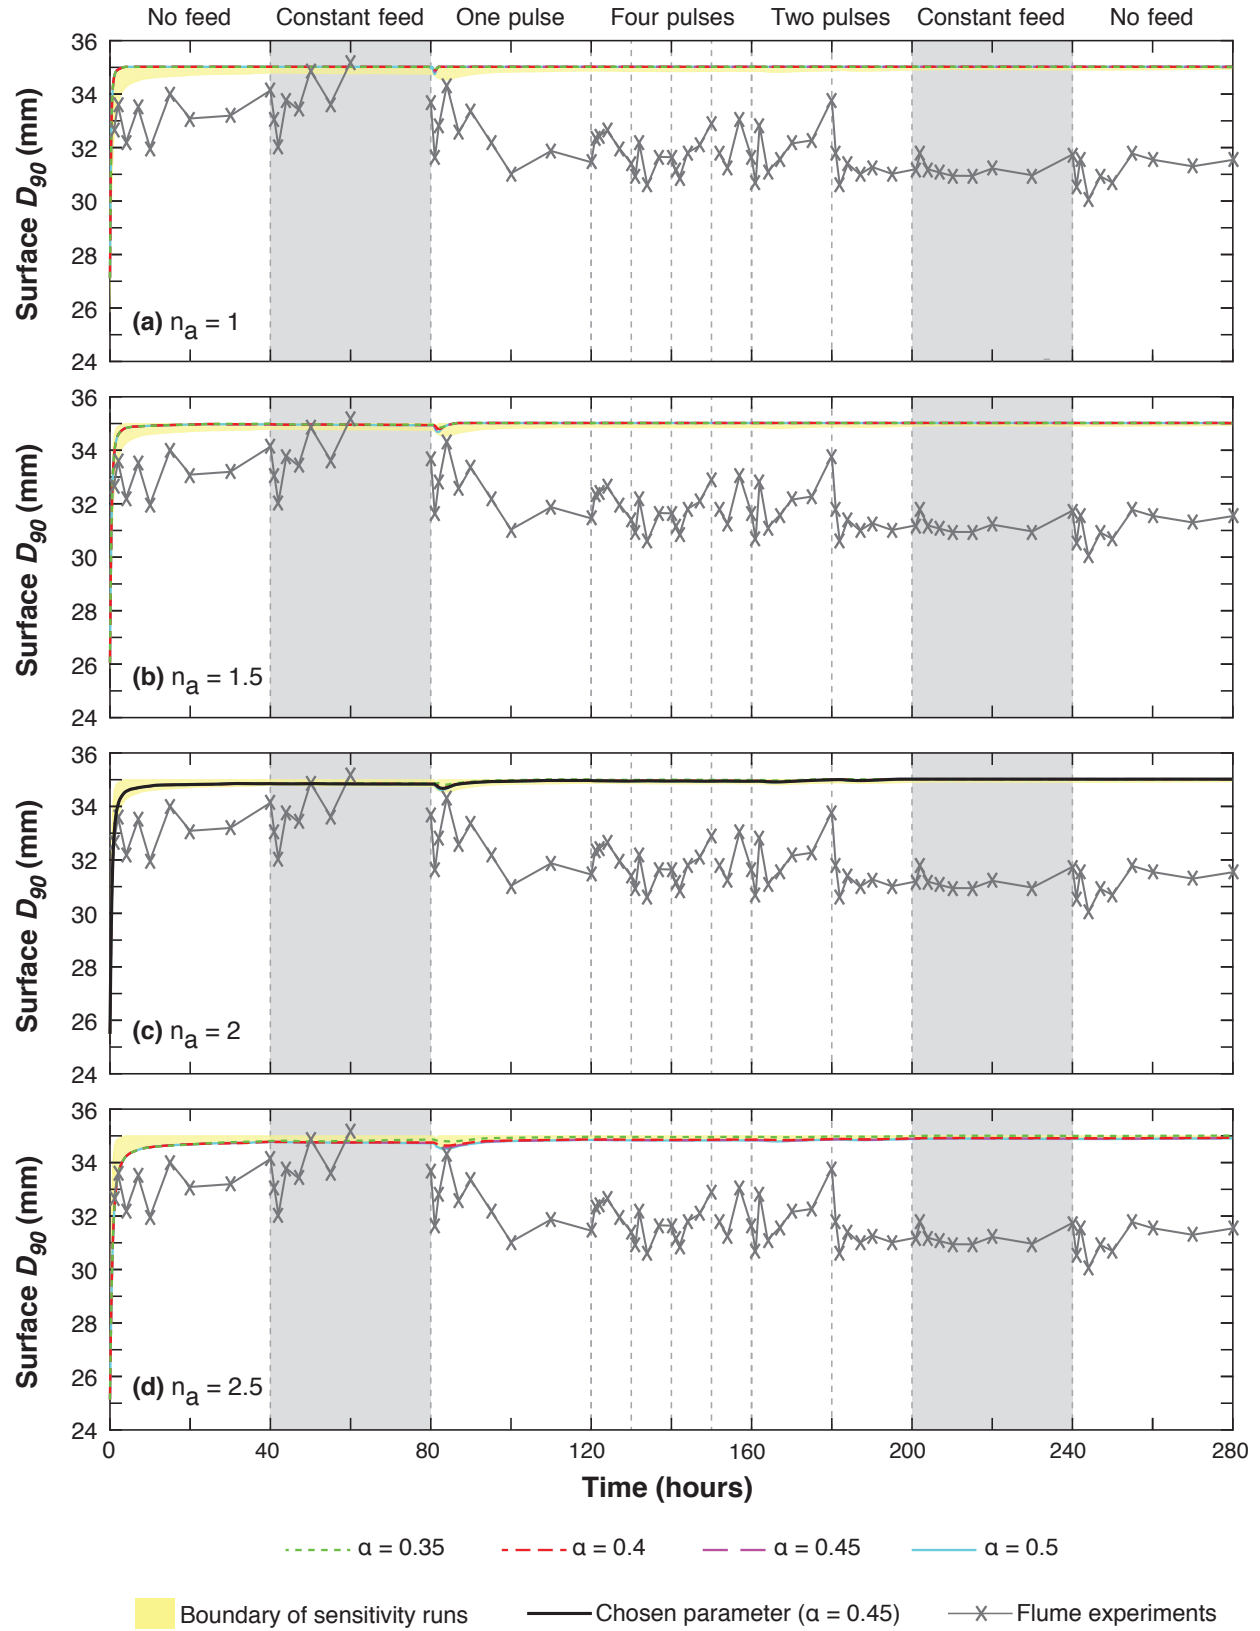

Figure S3: Sensitivity of modelled Surface  $D_{90}$  to active layer thickness factor  $n_a$  and active layer exchange ratio  $\alpha$  in the 'Original flume' (OF) event sequence.

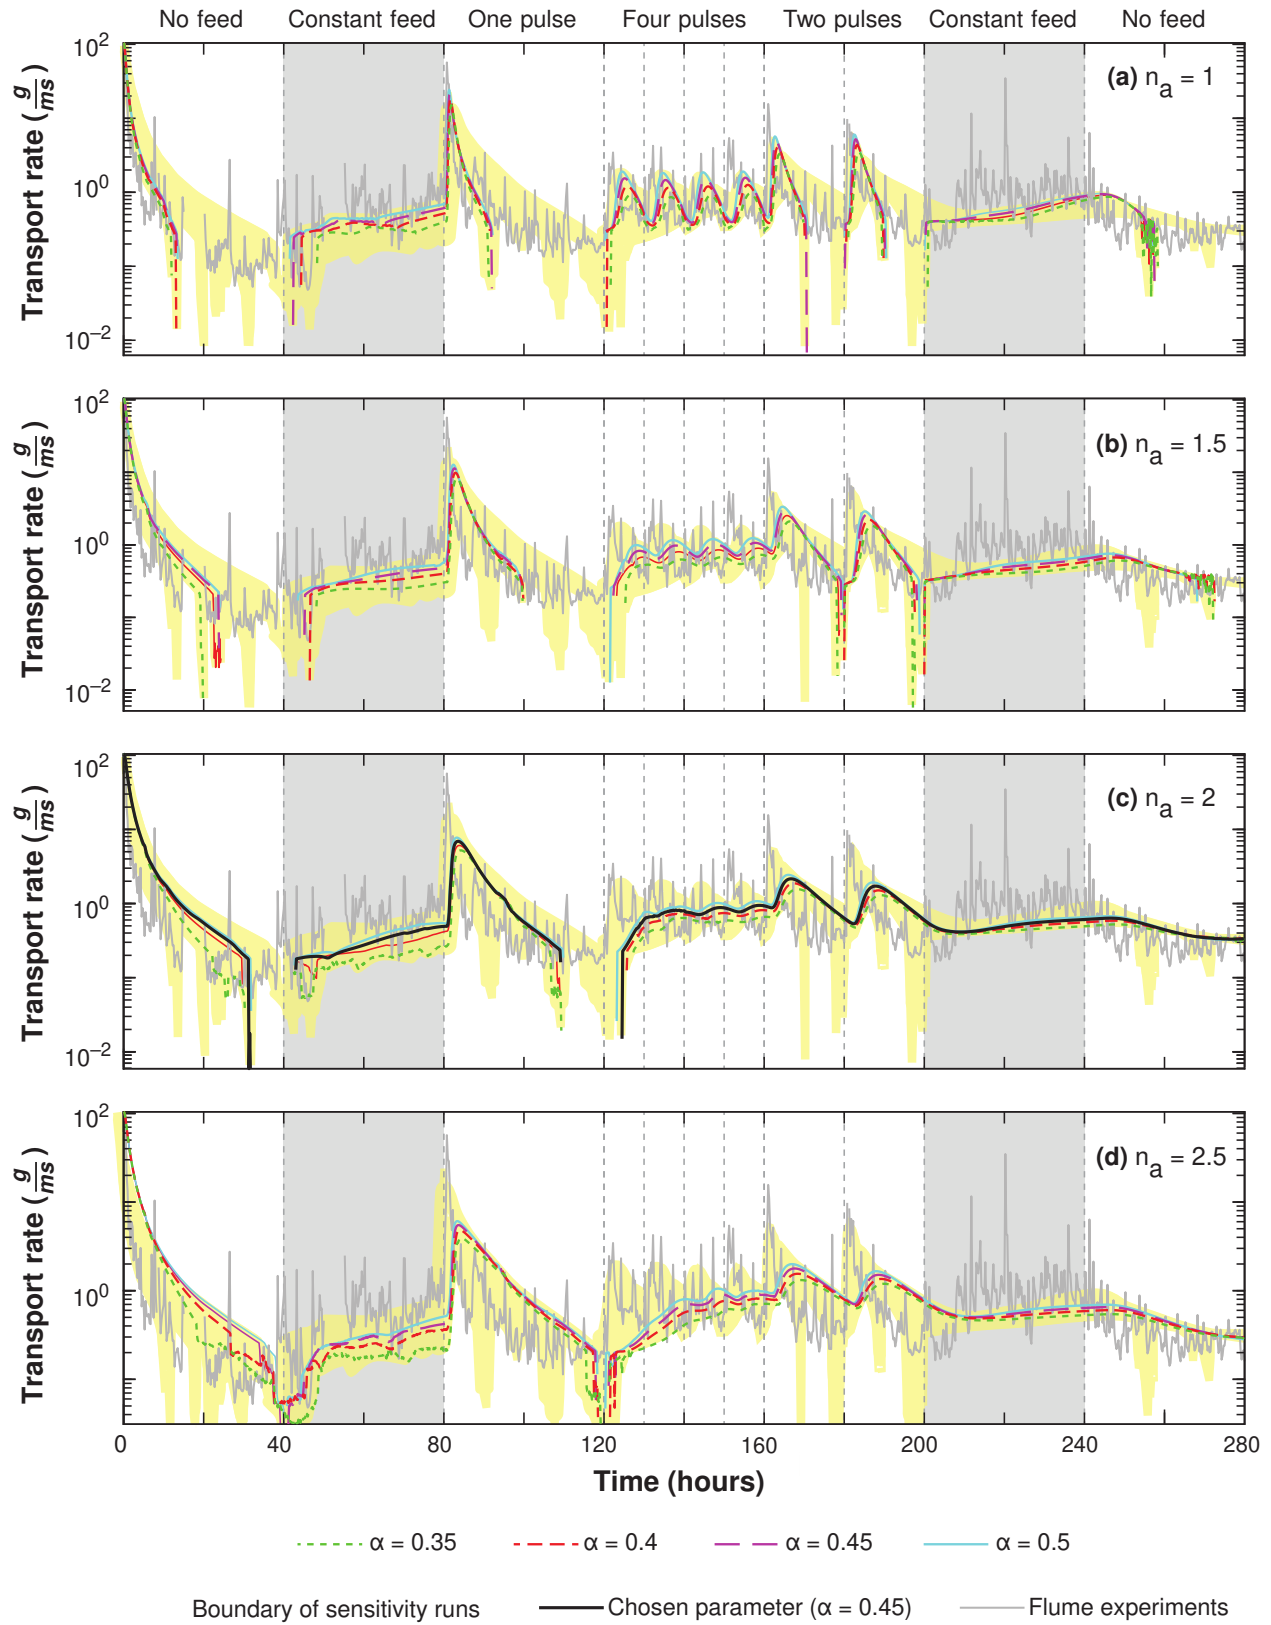

Figure S4: Sensitivity of modelled transport rate to active layer thickness factor  $n_a$  and active layer exchange ratio  $\alpha$  in the 'Original flume' (OF) event sequence.

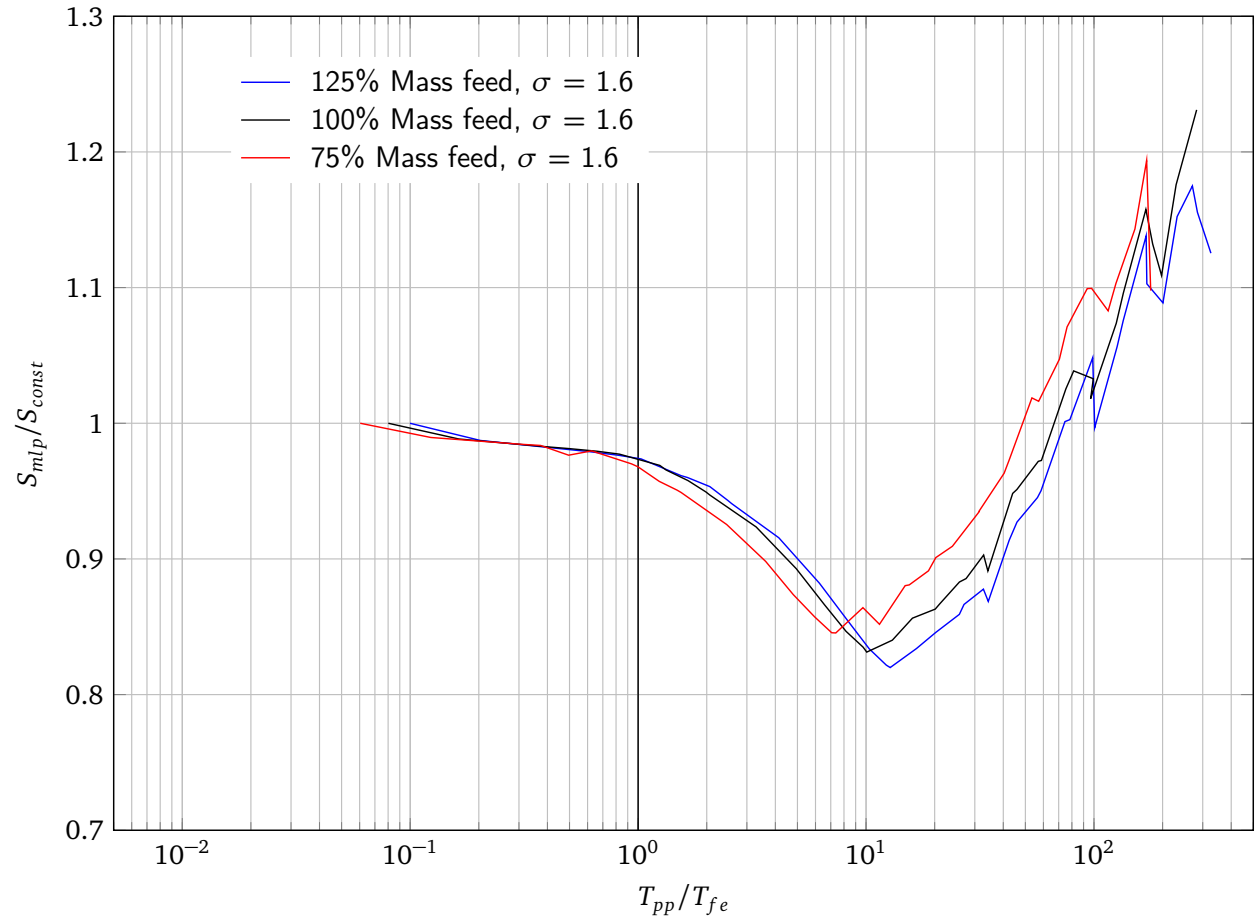

Figure S5: Effect of a 25% increased and 25% decreased total sediment feed on the equilibrium slope in the non-dimensionalized time scale. All simulations were executed with  $\sigma = 1.6$ .
